# Supplementary material for: A Scoping Review of Policies Related to the Prevention and Control of Overweight and Obesity in Africa
Source: MDPI journal article supplement (doi:10.3390/nu13114028), 2021-11-11
Supplement: s1 [file s1]

Supplementary Table 1: National policies, actions, programmes, and strategies on diet and physical activity to prevent obesity/non-communicable diseases in African countries

| Country                     | Title and type of document                                                                                                 | Year                                |
|-----------------------------|----------------------------------------------------------------------------------------------------------------------------|-------------------------------------|
| Algeria                     | Multi-sectoral Integrated Strategic Plan for Control of Risk Factors of Non-Communicable Diseases                          | 2015-2019                           |
| Angola                      | Health Development Plan                                                                                                    | 2012-2025                           |
| Benin                       | Integrated Strategic Plan for the Control of Non-communicable Diseases                                                     | 2014-2018                           |
| Botswana                    | Multi-sectoral Strategy for the Prevention and Control of Non-Communicable Diseases                                        | 2017-2022                           |
| Burkina Faso                | Integrated Strategic Plan for Control of Non-communicable Diseases<br>Nutrition Policy                                     | 2016-2020*<br>2016                  |
| Burundi                     | Multi-sectoral Strategic Plan for Food Safety and Nutrition<br>Health Development Plan                                     | 2014-2017*<br>2011-2015*            |
| Cameroon                    | Health Development Plan<br>Food and Nutrition Policy                                                                       | 2016-2020<br>2007-2011              |
| Cape Verde                  | Health Development Plan                                                                                                    | 2012-2016*                          |
| Central African Republic    | Policy for the Prevention and Control of Non-communicable Diseases                                                         | 2014                                |
| Chad                        | Multi-sectoral Plan to fight and control non-communicable Diseases                                                         | 2017-2021                           |
| Comoros                     | Strategic Document for Prevention and Control of Non-communicable Diseases                                                 | 2013*                               |
| Congo                       | Integrated Plan for Control of Non-communicable Diseases                                                                   | 2013-2017                           |
| Cote d'Ivoire (Ivory Coast) | Integrated Strategic Plan for Prevention and Management of Non-communicable Diseases                                       | 2015-2019                           |
| DR of the Congo             | Health Development Plan                                                                                                    | 2014*                               |
| Djibouti                    | Health Development Plan                                                                                                    | 2013-2017*                          |
| Egypt                       | Multi-sectoral Action Plan For Non-communicable Diseases Prevention and Control                                            | 2018-2022                           |
| Ethiopia                    | Strategic Action Plan for Prevention and Control of Non-communicable Diseases                                              | 2014-2016                           |
| Eritrea                     | Non-communicable Diseases Policy                                                                                           | 2008*                               |
| Gabon                       | Policy on Food Security and Nutrition                                                                                      | 2017-2025                           |
| Gambia                      | Health Sector Strategic Plan<br>Nutrition Policy                                                                           | 2014-2020*<br>2010-2020             |
| Ghana                       | Strategy for the Management, Prevention and Control of Chronic Non-Communicable Diseases in Ghana                          | 2012-2016                           |
| Guinea-Bissau               | National Nutrition Policy                                                                                                  | 2008-2017                           |
| Guinea                      | Integrated Programme for the Prevention and Control of Non-communicable Diseases                                           | 2011-2015                           |
| Kenya                       | Strategy for the Prevention and Control of Non Communicable Diseases                                                       | 2015-2020                           |
| Lesotho                     | Multi-sectoral Integrated Strategic Plan for the Prevention and Control of Non-communicable Diseases                       | 2014-2020                           |
| Liberia                     | Policy and Strategic Plan on Health Promotion<br>Food Security and Nutrition Strategy                                      | 2016-2021<br>2008                   |
| Madagascar                  | National Policy for Prevention and fight against Integrated non-communicable chronic Diseases<br>Action Plan for Nutrition | 2017-2021*                          |
| Malawi                      | Health Sector Strategic Plan II<br>Multi-sector Nutrition Policy                                                           | 2017-2022*<br>2018-2022             |
| Mali                        | Policy to fight against non-Communicable Diseases                                                                          | 2013*                               |
| Mauritania                  | Health Development Plan                                                                                                    | 2012-2020                           |
| Mauritius                   | Health Sector Strategy<br>Plan of Action for Nutrition Final<br>Action Plan on Physical Activity                           | 2017-2021<br>2009-2010<br>2011-2014 |

|                       |                                                                                                      |                        |
|-----------------------|------------------------------------------------------------------------------------------------------|------------------------|
| Morocco               | Multi-sectoral Integrated Strategic Plan for the Prevention and Control of Non-communicable Diseases | 2016-2025              |
| Mozambique            | Strategic Plan for Prevention and Control of Non-communicable Diseases                               | 2008-2014              |
| Namibia               | Health Policy Framework                                                                              | 2010-2020*             |
|                       | Strategic Plan for Nutrition                                                                         | 2011-2015              |
| Niger                 | Integrated Strategic Plan for Prevention and Control of Chronic Non-communicable Diseases            | 2012                   |
| Nigeria               | Policy and Strategic Plan of Action On Non-communicable Diseases                                     | 2013                   |
| Rwanda                | Non-communicable Diseases Policy                                                                     | 2015                   |
|                       | Food and Nutrition Policy                                                                            | 2013-2018              |
| Sao Tome and Principe | Health Development Plan                                                                              | 2017-2021              |
| Senegal               | Health Development Plan                                                                              | 2009-2018*             |
| Seychelles            | Strategy for the Prevention and Control of Non-Communicable Diseases                                 | 2016-2025              |
| Sierra Leone          | Non-communicable Diseases Strategic Plan                                                             | 2013-2017              |
|                       | Food and Nutrition Security Policy                                                                   | 2012-2016 <sup>±</sup> |
| Somaliland            | National Health Policy                                                                               | 2011*                  |
|                       | Health Sector Strategic Plan                                                                         | 2013-2016              |
| South Africa          | Strategy for the Prevention and Control of Obesity                                                   | 2015-2020              |
| South Sudan           | Health Policy Framework and Work Plan                                                                | 2013-2016*             |
| Sudan                 | 25 years Strategic Plan for Health Sector                                                            | 2003-2027*             |
| Swaziland             | Non-communicable Diseases Prevention and Control Policy                                              | 2016                   |
| Tanzania              | Strategic and Action Plan for the Prevention and Control of Non-communicable Diseases                | 2016-2020              |
| Togo                  | Integrated Policy and Strategic Plan to fight against non-communicable diseases                      | 2012-2015              |
| Tunisia               | Strategy for Prevention and Control of Obesity                                                       | 2013-2017              |
| Uganda                | Health Sector Development Plan                                                                       | 2015/16 *              |
|                       |                                                                                                      | 2019/20                |
|                       | Nutrition Action Plan                                                                                | 2011-2016*             |
| Zambia                | Strategic Plan Non-communicable Diseases and their risk factors                                      | 2013-2016              |
| Zimbabwe              | National Health Strategy                                                                             | 2016-2020              |

DR: Democratic Republic; \* denotes documents that were excluded from the review
